# Supplementary material for: High BTBD7 Expression Positive is Correlated with SLUG- Predicted Poor Prognosis in Hormone Receptor- Negative Breast Cancer
Source: Research Square preprint supplement (doi:10.21203/rs.3.rs-30238/v2), 2021-01-05
Supplement: Supplementary file 1 [file c495b711f462222f6e7a5b78.xlsx]

## Sheet: KEGGId
ID	Description	GeneRatio	BgRatio	pvalue	p.adjust	qvalue	geneID	Count
R-HSA-73857	RNA Polymerase II Transcription	52	1316	7.16e-28	1.61e-24	1.61e-24	ZNF699|MED23|BAX|HIPK1|PRELID1|GTF2A1|CCNT1|CCNT2|CPSF2|ZNF426|PPM1A|AFF4|RNF111|NR2C2AP|LSM10|ZNF585B|ZNF347|ZNF430|PHC3|ARID2|ZNF417|ZNF510|ZNF641|KMT2C|ZNF221|KMT2A|ZNF41|SOCS4|SP1|TCF12|CREB1|NR2C2|ZNF573|PDPK1|EP300|PAPOLA|POLR2J|ZNF445|TJP1|ZNF615|TAF1|ZNF616|ZNF619|ZNF484|TAF1L|ZKSCAN1|ZNF791|PBRM1|ZKSCAN8|ATXN3|ZNF770|ATF2	52
R-HSA-162582	Signal Transduction	52	2689	9.21e-15	5.19e-12	5.19e-12	ATP6V1F|SMAD5|SEL1L|BAX|UHMK1|ADAM10|LATS1|GTF2A1|SP1|CCNT1|ARHGAP5|CCNT2|KBTBD7|EP300|PPM1A|CHD8|PSEN1|MIB1|NF1|PHC3|DRAP1|RPS6KA5|RANBP2|NCOA2|ARHGEF12|ZNF225|TRAF6|STAG2|DAAM1|RNF111|REST|FER|CREB1|NUMB|DYNC1H1|PPP2R5E|USP34|TAOK1|POLR2J|PRKAR2A|TJP1|UBE2M|SOS2|BDP1|XIAP|RCOR1|PFN1|BMPR2|MYO9A|PDPK1|STAM2|ATF2	52
R-HSA-392499	Metabolism of proteins	49	2012	1.02e-17	1.15e-14	1.15e-14	RAD23A|SEL1L|NCOA2|ADAM10|MRPS12|SHPRH|EXOSC4|KBTBD7|GPS1|STAM2|ASXL2|CDC34|ARF5|PHC3|CREBRF|ADRM1|RANBP2|TTLL5|KLHL11|MRPL12|PFDN2|WDR20|TRAF6|COPE|STAG2|SP3|MRPL38|EIF5|USP12|MRPL4|MGAT5|MYSM1|DYNC1H1|INO80D|EP300|USP34|MAN1A2|RAB27B|UBE2M|EXOC5|FEM1B|MRPS24|RAB33B|MAN2A1|GADD45GIP1|DCAF5|APC|UBE2S|ATXN3	49
R-HSA-212436	Generic Transcription Pathway	47	1193	3.65e-25	5.48e-22	5.48e-22	ZNF699|MED23|BAX|HIPK1|PRELID1|CCNT1|CCNT2|ZNF426|PPM1A|RNF111|NR2C2AP|ZNF585B|ZNF347|ZNF430|PHC3|ARID2|ZNF417|ZNF510|ZNF641|KMT2C|ZNF221|KMT2A|ZNF41|SOCS4|SP1|TCF12|CREB1|NR2C2|ZNF573|PDPK1|EP300|POLR2J|ZNF445|TJP1|ZNF615|TAF1|ZNF616|ZNF619|ZNF484|TAF1L|ZKSCAN1|ZNF791|PBRM1|ZKSCAN8|ATXN3|ZNF770|ATF2	47
R-HSA-597592	Post-translational protein modification	38	1412	3.2e-15	2.89e-12	2.89e-12	RAD23A|NCOA2|ADAM10|SHPRH|KBTBD7|GPS1|STAM2|ASXL2|CDC34|ARF5|PHC3|FEM1B|RANBP2|TTLL5|KLHL11|SEL1L|WDR20|TRAF6|COPE|STAG2|SP3|MAN2A1|USP12|MGAT5|MYSM1|DYNC1H1|INO80D|EP300|USP34|MAN1A2|RAB27B|UBE2M|RAB33B|ADRM1|DCAF5|APC|UBE2S|ATXN3	38
R-HSA-168256	Immune System	36	2096	3.89e-09	3.58e-07	3.58e-07	HECTD1|NFKBIB|ANAPC11|ADAM10|ATP6V1F|REL|ATP7A|KBTBD7|EEA1|PSEN1|CDC34|LTN1|PDPK1|NF1|RNF111|PJA2|RANBP2|KLHL11|ZNF225|TRAF6|BDP1|CREB1|HERC1|DYNC1H1|UBR1|EP300|SOS2|PDAP1|UBE2M|RPS6KA5|PTGES2|LNPEP|PPP2R5E|UBE2S|BOLA2|ATF2	36
hsa05168	Herpes simplex virus 1 infection	19	492	1.14e-10	1.77e-08	1.77e-08	ZNF699|ZNF221|ZNF615|TRAF6|ZNF41|ZNF616|ZNF619|ZNF81|ZNF484|ZNF845|BAX|ZNF426|ZNF585B|ZNF347|ZNF430|ZNF417|ZNF510|ZNF641|ZNF791	19
R-HSA-8953854	Metabolism of RNA	19	667	1.41e-08	1.2e-06	1.2e-06	DDX49|HSD17B10|TNPO1|SMG1|WDR36|RPP21|SNRPA|LSM7|LSM10|CPSF2|LSM4|UTP14C|POP7|BUD31|TTC37|RANBP2|PAPOLA|EXOSC4|POLR2J	19
R-HSA-1280218	Adaptive Immune System	19	748	8.05e-08	5.04e-06	5.04e-06	KBTBD7|KLHL11|HECTD1|UBE2M|TRAF6|NFKBIB|ANAPC11|DYNC1H1|CDC34|LTN1|HERC1|REL|PDPK1|LNPEP|PPP2R5E|UBE2S|PJA2|UBR1|RNF111	19
R-HSA-199991	Membrane Trafficking	18	631	3.33e-08	2.68e-06	2.68e-06	GPS1|RAB27B|TJP1|RAB33B|STAM2|EXOC5|NAA30|FCHO2|ARF5|MAN2A1|PIK3C2A|GCC2|COPE|DYNC1H1|LNPEP|TRIP11|DENND4C|MAN1A2	18
R-HSA-5653656	Vesicle-mediated transport	18	669	7.78e-08	4.94e-06	4.94e-06	GPS1|RAB27B|TJP1|RAB33B|STAM2|EXOC5|NAA30|FCHO2|ARF5|MAN2A1|PIK3C2A|GCC2|COPE|DYNC1H1|LNPEP|TRIP11|DENND4C|MAN1A2	18
hsa01100	Metabolic pathways	18	1433	0.00139344	0.0137966	0.0137966	ACER2|HSD17B10|ATP6V1F|PIKFYVE|NDUFB7|PTGES2|ALDH6A1|NDUFB11|SRM|MAN2A1|PIK3C2A|SPTLC2|MGAT5|GALC|B3GAT3|ENTPD5|MAN1A2|NDUFA11	18
R-HSA-168249	Innate Immune System	17	1043	0.000106983	0.00212316	0.00212316	PDAP1|ATP6V1F|UBE2M|RPS6KA5|TRAF6|EEA1|PTGES2|PSEN1|CDC34|CREB1|ADAM10|NFKBIB|DYNC1H1|PDPK1|EP300|ATP7A|ATF2	17
R-HSA-1266738	Developmental Biology	17	1082	0.000163821	0.00290557	0.00290557	NCOA2|PRKAR2A|ARHGEF12|RPS6KA5|SOS2|PSEN1|DRAP1|KMT2A|CREB1|ADAM10|PFN1|KMT2C|NUMB|TCF12|EP300|MED23|POLR2J	17
R-HSA-1280215	Cytokine Signaling in Immune system	15	836	9.8e-05	0.00196187	0.00196187	KBTBD7|ZNF225|RPS6KA5|UBE2M|SOS2|TRAF6|NFKBIB|BDP1|CREB1|BOLA2|NF1|PDPK1|PPP2R5E|RANBP2|ATF2	15
R-HSA-4839726	Chromatin organization	14	273	1.07e-09	1.17e-07	1.17e-07	NCOA2|KMT2C|ASH1L|CLOCK|ARID2|KMT2A|REST|RCOR1|PBRM1|NSD1|ARID4A|EP300|SETD7|ATF2	14
R-HSA-3247509	Chromatin modifying enzymes	14	273	1.07e-09	1.17e-07	1.17e-07	NCOA2|KMT2C|ASH1L|CLOCK|ARID2|KMT2A|REST|RCOR1|PBRM1|NSD1|ARID4A|EP300|SETD7|ATF2	14
R-HSA-983168	Antigen processing: Ubiquitination & Proteasome degradation	13	308	3.82e-08	3.02e-06	3.02e-06	KBTBD7|KLHL11|HECTD1|UBE2M|ANAPC11|CDC34|LTN1|HERC1|RNF111|LNPEP|UBE2S|PJA2|UBR1	13
R-HSA-983169	Class I MHC mediated antigen processing & presentation	13	370	2.91e-07	1.56e-05	1.56e-05	KBTBD7|KLHL11|HECTD1|UBE2M|ANAPC11|CDC34|LTN1|HERC1|RNF111|LNPEP|UBE2S|PJA2|UBR1	13
R-HSA-5688426	Deubiquitination	12	296	1.94e-07	1.15e-05	1.15e-05	WDR20|TRAF6|RAD23A|USP34|STAM2|ASXL2|USP12|MYSM1|INO80D|EP300|ADRM1|ATXN3	12
R-HSA-194315	Signaling by Rho GTPases	12	449	1.25e-05	0.000347355	0.000347355	NCOA2|ARHGEF12|SOS2|DAAM1|PFN1|PDPK1|MYO9A|DYNC1H1|ARHGAP5|PPP2R5E|TAOK1|RANBP2	12
R-HSA-449147	Signaling by Interleukins	12	619	0.000244278	0.00382109	0.00382109	KBTBD7|RPS6KA5|SOS2|TRAF6|NFKBIB|BDP1|CREB1|NF1|PDPK1|PPP2R5E|BOLA2|ATF2	12
R-HSA-8939211	ESR-mediated signaling	11	221	8.88e-08	5.48e-06	5.48e-06	NCOA2|EP300|STAG2|SP1|UHMK1|CREB1|GTF2A1|CCNT1|PDPK1|ATF2|POLR2J	11
R-HSA-9006931	Signaling by Nuclear Receptors	11	264	4.85e-07	2.5e-05	2.5e-05	NCOA2|EP300|STAG2|SP1|UHMK1|CREB1|GTF2A1|CCNT1|PDPK1|ATF2|POLR2J	11
R-HSA-9006925	Intracellular signaling by second messengers	11	288	1.1e-06	4.47e-05	4.47e-05	ZNF225|TRAF6|XIAP|REST|PRKAR2A|RCOR1|CREB1|PHC3|PDPK1|PPP2R5E|ATF2	11
